# Supplementary material for: Valanginian occurrence of Pelomedusoides turtles in northern South America: revision of this hypothesis based on a new fossil remain
Source: PeerJ. 2020 Aug 24;8:e9810. doi: 10.7717/peerj.9810 (PMC7450993; doi:10.7717/peerj.9810)
Supplement: Supplemental Information 1 [file peerj-08-9810-s001.xlsx]

## Sheet: Sheet1
Data S1
Measurements in cm	Carapace total length	Left Mesop.	Right Mesop.	Left Peripheral6	Right Peripheral6	Left Peripheral7	Right Peripheral7
Podocnemis expansa USNM-29476	88.17	13.06	12.88	10.84	11.05	12.95	12.66
Podocnemis expansa ICN-6319	70.3	9.78	10.39	8.61	9.18	9.71	10.2
Podocnemis expansa ICN-8921	71.75		9.75	8.32	8.2	9.3	8.45
Podocnemis erythrocephala MNHN-1463	20.91	2.64	2.35	2.57	2.61	2.88	2.42
Podocnemis erythrocephala CRI-1194	21.87	2.7	2.63	2.89	2.75	2.93	2.84
Podocnemis erythrocephala CRI-8207	23.61	2.73	2.99	2.83	2.78	2.98	2.95
Podocnemis erythrocephala CRI-8208	25.02	3.18	3.19	2.83	2.57	3.41	3.14
Podocnemis lewyana ICN-6207	41.75	5.35	5.54	5.07	5.06	5.15	5.12
Podocnemis lewyana ICN-1699	29.53	3.41	3.35	3.22	3.24	3.54	3.56
Podocnemis lewyana MNHN-286	11.19	1.62	1.53	1.48	1.52	1.61	1.64
Podocnemis sextuberculata CRI-6543	17.8	1.68	1.87	2.09	2.11	1.87	1.99
Podocnemis unifilis CRI-2778	19.44	2.52	2.61	2.35	2.4	2.48	2.63
Peltocephalus dumerlianus ICN-7324	35.15	3.92	3.36	4.78	4.38	4.53	5.31
Peltocephalus dumerlianus CRI-3344	39.25	4.32	4.41	4.97	4.93	5.59	5.51
Peltocephalus dumerlianus CRI-3295	20.81	2.27	2.14	2.77	2.59	2.75	2.41
Francemys gadoufaouaensis MNHN.F GDF 801	13.56	1.92	1.71	1.93	2.01	1.97	1.63
Atolcheys lepida UERJ.MC 2	20.66 (Estimated)	2.32
UR-CP-0025 Pelomedusoides	40.59 (Estimated)		5.37		5.26
